# Supplementary material for: Room-temperature synthesis with inert bubble templates to produce “clean” PdCoP alloy nanoparticle networks for enhanced hydrazine electro-oxidation
Source: Royal Society of Chemistry journal article supplement (doi:10.1039/c4ra14423f), 2015-01-01
Supplement: c4ra14423f1.pdf [file c4ra14423f1.pdf]

## Electronic Supplementary Information (ESI)

### Room-temperature synthesis with inert bubble templates to produce “clean” PdCoP alloy nanoparticle networks for enhanced hydrazine electro-oxidation

Yuanyuan Ma<sup>1</sup>, Rongfang Wang<sup>1\*</sup>, Hui Wang<sup>1</sup>, Julian Key<sup>2</sup>, Shan Ji<sup>2\*\*</sup>

<sup>1</sup> College of Chemistry and Chemical Engineering, Northwest Normal University, Lanzhou 730070, China

<sup>2</sup> South African Institute for Advanced Materials Chemistry, University of the Western Cape, Private Bag X17, Bellville, Cape Town 7535, South Africa

**Table S1.** Synthesis conditions and the mass of different precursors.

| Sample   | CoCl <sub>2</sub> •6H <sub>2</sub> O (mg) | NaBH <sub>4</sub> (mg) | Bubbled N <sub>2</sub> | Initial atom ratio Pd:Co:P | Actual atom ratio Pd:Co:P |
|----------|-------------------------------------------|------------------------|------------------------|----------------------------|---------------------------|
| PdCoP-1  | 160                                       | 70.3                   | √                      | 1:6:14                     | 1:5.6:11                  |
| PdCoP-2  | 215                                       | 76.4                   | √                      | 1:8:14                     | 1:7.5:11                  |
| PdCoP-3  | 270                                       | 80.6                   | √                      | 1:10:14                    | 1:9.2:11                  |
| PdCoP-4  | 325                                       | 92.0                   | √                      | 1:12:14                    | 1:11.5:11                 |
| PdCoP-5  | 380                                       | 120                    | √                      | 1:14:14                    | 1:13.4:11                 |
| PdCoP GA | 270                                       | 80.6                   | ×                      | 1:10:14                    | 1:9.5:11                  |
| PdCo ANN | 270                                       | 71.2                   | √                      | 1:10:14                    | 1:5.5                     |

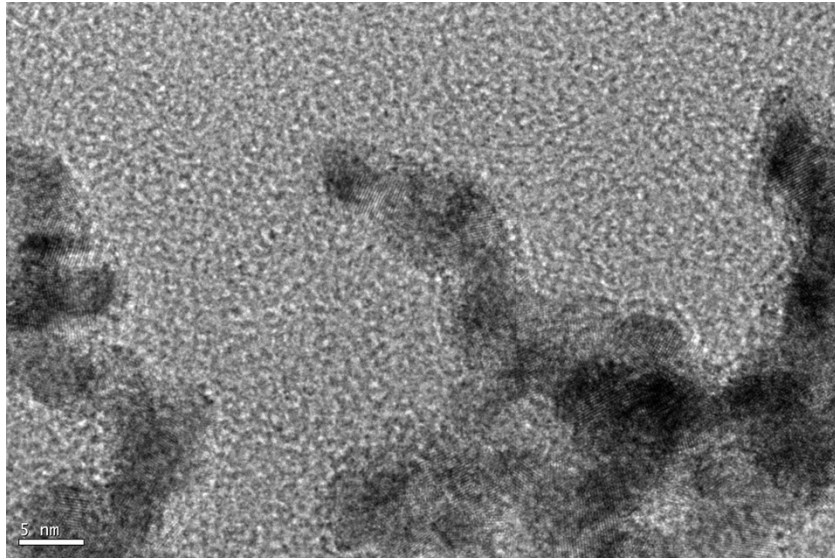

**Figure S1.** HRTEM image of PdCoP-3.

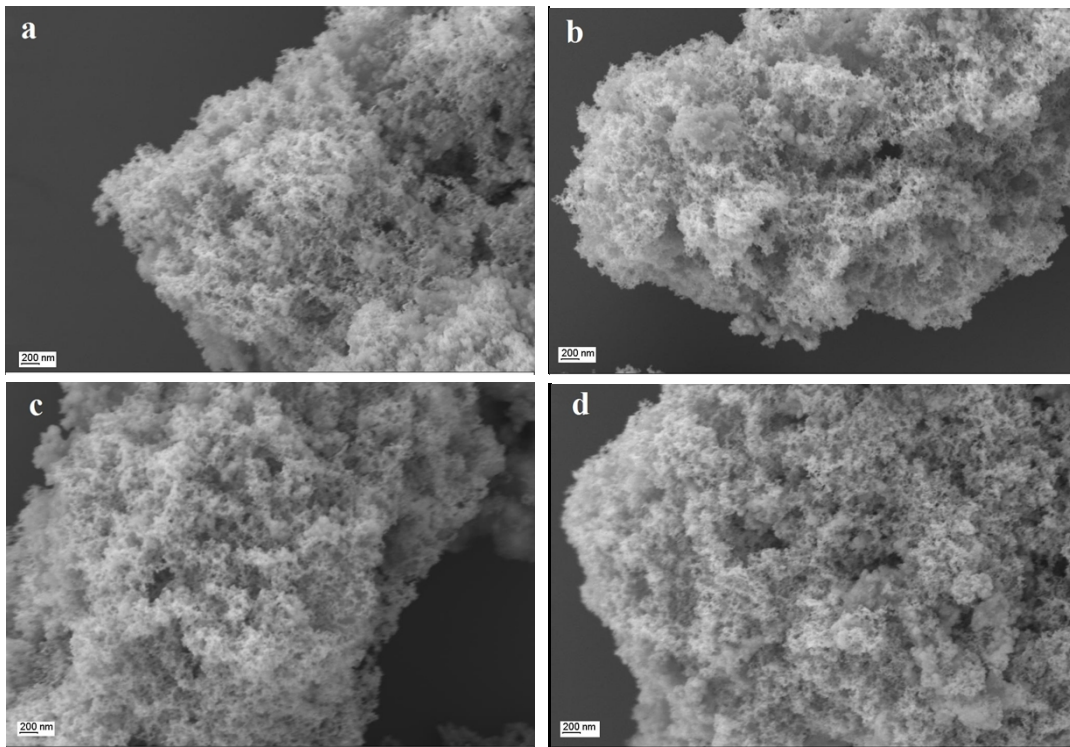

**Figure S2.** SEM images of the PdCoP-1(a), PdCoP-2(b), PdCoP-4(c), PdCoP-5(d) samples.

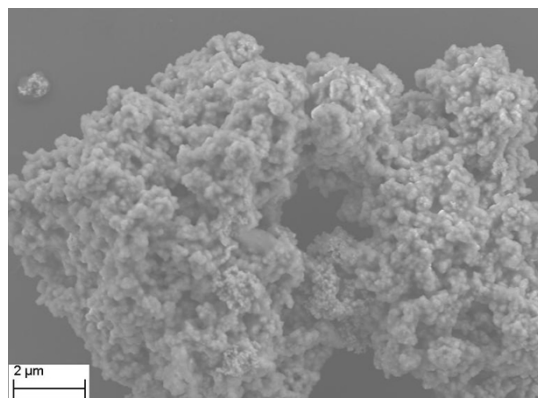

**Figure S3.** SEM image of the PdCoP grain aggregates (GA).

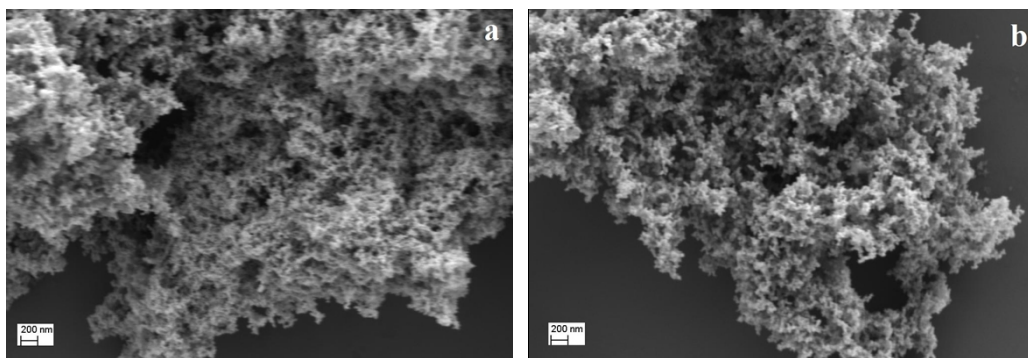

**Figure S4.** SEM images of PdCoP samples with a molar ratio of Pd:Co:P=1:10:14 prepared by bubbling Ar (a) and He (b) gas.

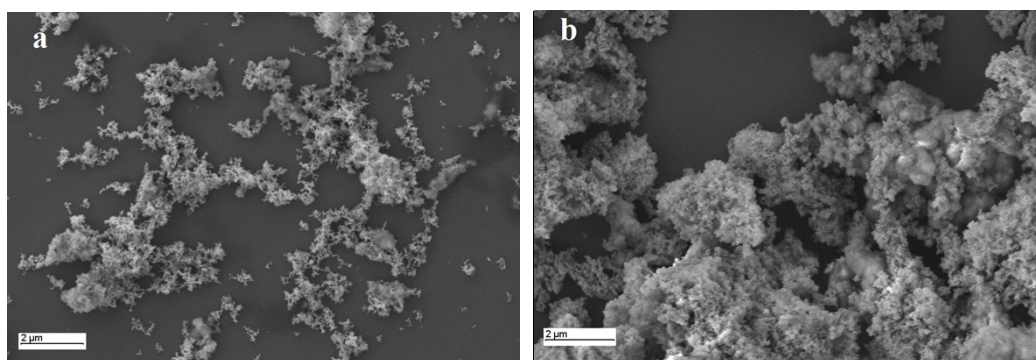

**Figure S5.** SEM images of the growth intermediates of the PdCoP samples with a molar ratio of Pd:Co:P=1:10:14 produced after (a) 0.5 h, and (b) 1.5 h.

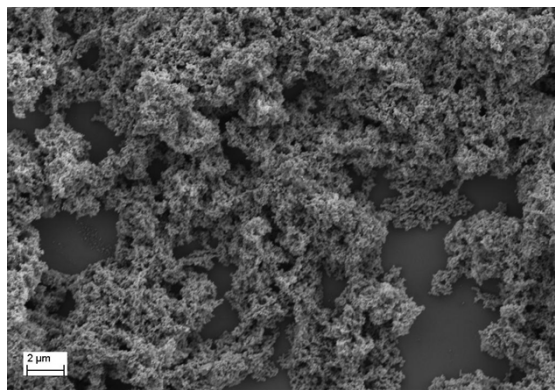

**Figure S6.** SEM image of the PdCo ANN.

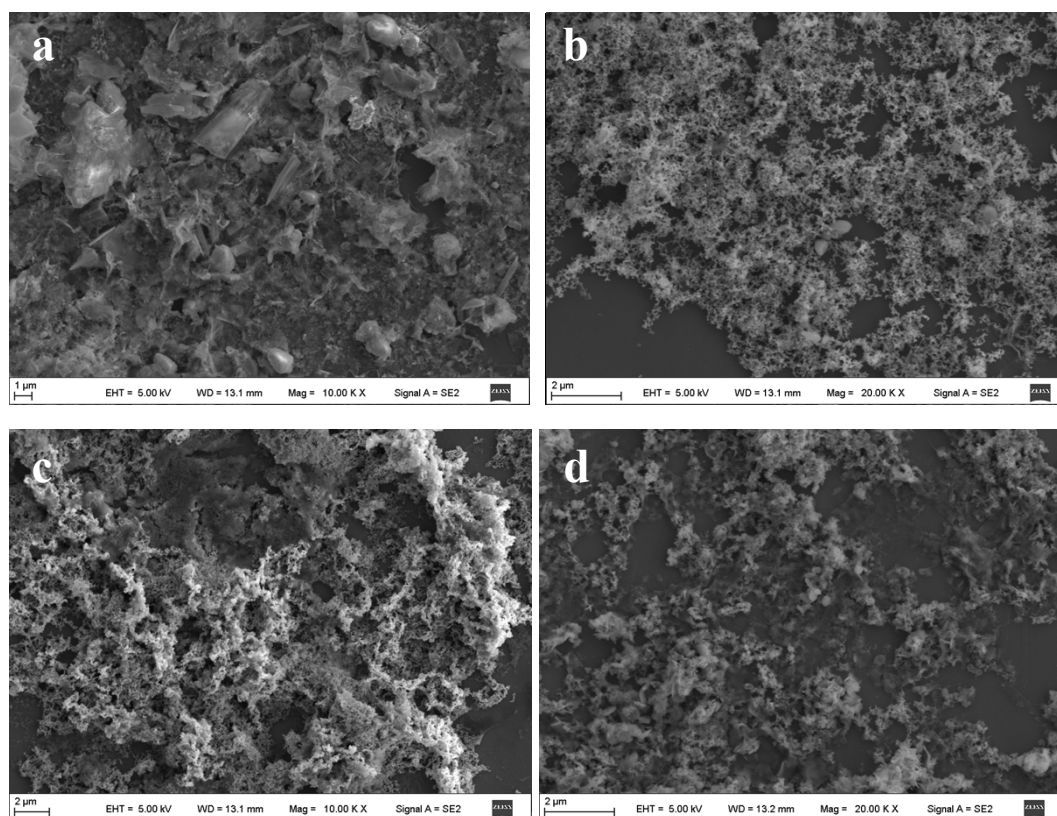

**Figure S7.** SEM images of PdCoP (a-d) samples. These samples were prepared by solvothermal synthesis as follows: 160 mg of  $\text{NaH}_2\text{PO}_2 \cdot \text{H}_2\text{O}$  and 480 mg of hexadecyl trimethyl ammonium bromide (CTAB) were dissolved in 30 mL water. 10 mL aqueous solution containing 20 mg of  $\text{PdCl}_2$  with pH  $\sim$  9 (NaOH) was added into the above solution. Subsequently, 20 mL of aqueous solution

containing 80.6 mg of NaBH<sub>4</sub> was added into the mixture under stirring, and the obtained solution was transferred to 100 mL Teflon-lined autoclaves, sealed and heated at 120 °C for 12 h, and allowed to cool naturally to ambient temperature. The resulting solid products were collected by centrifugation, washed with distilled water and ethanol. The final products, PdCoP-a were obtained. For PdCoP-b, PdCoP-c, and PdCoP-d, the above procedure and materials were used but with replacement of solvent and surfactant as shown in Table S2:

**Table S2.** The kinds of solvent and surfactant used in solvothermal synthesis.

| Sample  | Solvent                          | Surfactant       |
|---------|----------------------------------|------------------|
| PdCoP-a | H <sub>2</sub> O                 | CTAB             |
| PdCoP-b | C <sub>2</sub> H <sub>5</sub> OH | CTAB             |
| PdCoP-c | H <sub>2</sub> O                 | SDS <sup>a</sup> |
| PdCoP-d | C <sub>2</sub> H <sub>5</sub> OH | SDS <sup>a</sup> |

<sup>a</sup> sodium dodecyl sulfate

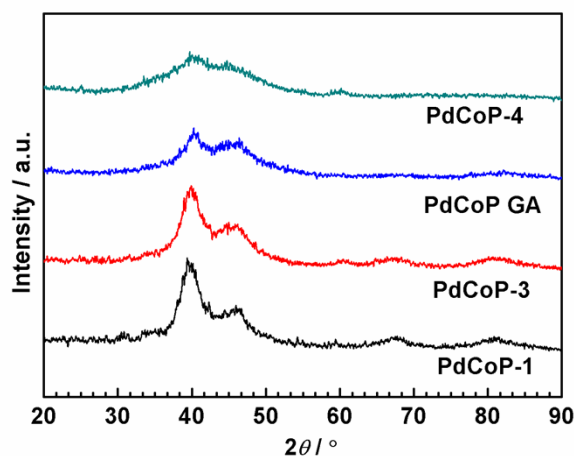

**Figure S8.** (a) XRD patterns of PdCoP-1, PdCoP-2, PdCoP-4, and PdCoP GA.

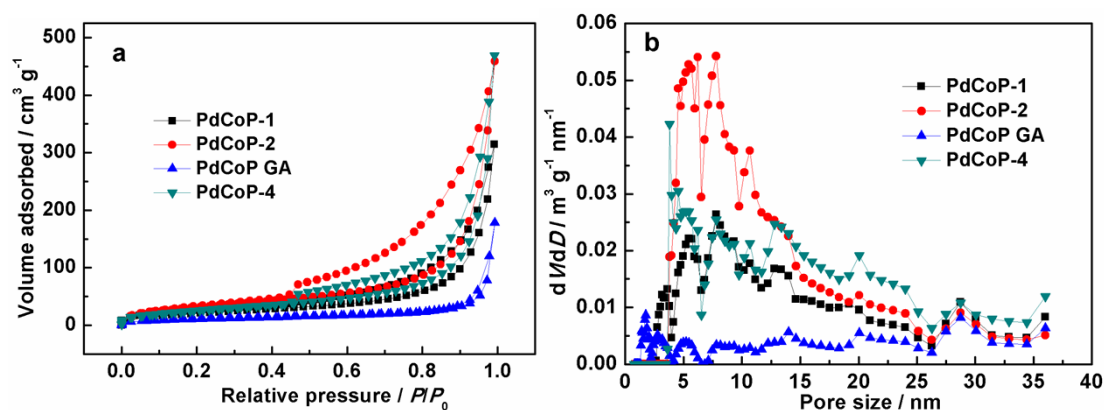

**Figure S9.** (a)  $N_2$  adsorption-desorption isotherms, and (b) pore size distribution of PdCoP-1, PdCoP-2, PdCoP-4, and PdCoP GA.

**Table S3.** Porous structure of six samples obtained from its  $N_2$  isotherms.

| Samples  | BET surface area<br>( $m^2 g^{-1}$ ) | The range of pores     | Pore volume<br>( $cm^3 g^{-1}$ ) |
|----------|--------------------------------------|------------------------|----------------------------------|
| PdCoP-1  | 76.2                                 | mesopore               | 0.486                            |
| PdCoP-2  | 115.4                                | mesopore               | 0.710                            |
| PdCoP-3  | 73.1                                 | mesopore               | 0.446                            |
| PdCoP-4  | 94.7                                 | mesopore               | 0.725                            |
| PdCoP GA | 38.6                                 | micropore and mesopore | 0.275                            |
| PdCo     | 49.5                                 | mesopore               | 0.390                            |



**Table S4.** Assignments, Binding energies (BEs) and concentrations of Pd 3d species in PdCoP-3 and PdCo ANN obtained from XPS results.

| Sample   | Pd 3d | BE <sup>a</sup> | Concentration <sup>b</sup> |
|----------|-------|-----------------|----------------------------|
| PdCoP-3  | 0     | 340.9&335.5     | 92.0                       |
|          | 2     | 342.5&336.8     | 8.0                        |
| PdCo ANN | 0     | 340.7&335.3     | 87.2                       |
|          | 2     | 342.9&336.5     | 12.8                       |

<sup>a</sup> Binding energy (in eV). <sup>b</sup> Per species (in at %).

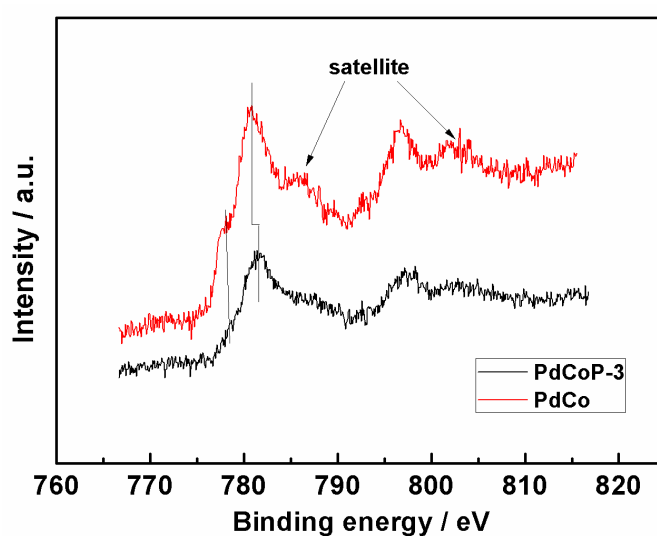

**Figure S10.** Co 3p XPS spectra of PdCoP-3 and PdCo ANN.

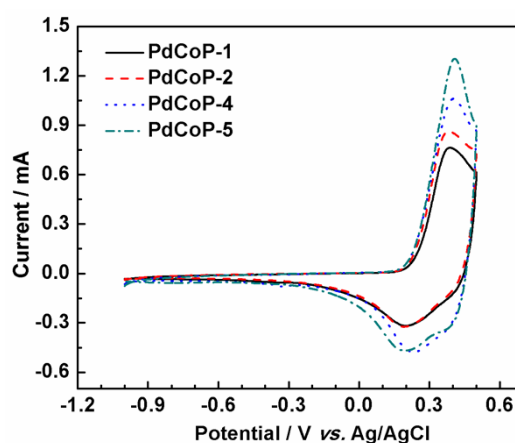

**Figure S11.** (c) CVs on PdCoP-1, PdCoP-2, and PdCoP-4 electrodes in N<sub>2</sub>-saturated 0.1 mol L<sup>-1</sup> KOH solution at a scan rate of 20 mV s<sup>-1</sup>.

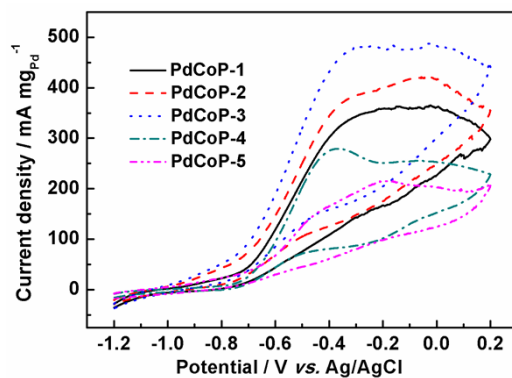

**Figure S12.** CVs on a series of PdCoP ANN electrodes in  $N_2$ -saturated  $0.1 \text{ mol L}^{-1}$   $N_2H_4 + 0.1 \text{ mol L}^{-1}$  KOH +  $0.1 \text{ mol L}^{-1}$  KOH solution at a scan rate of  $100 \text{ mV s}^{-1}$ .

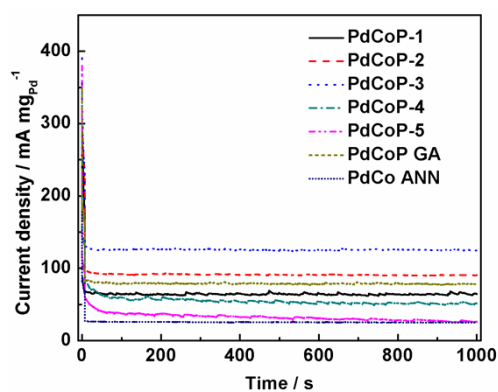

**Figure S13.** Chronoamperometry curves of the all samples in  $N_2$ -saturated  $0.1 \text{ mol L}^{-1}$   $N_2H_4 + 0.1 \text{ mol L}^{-1}$  KOH +  $0.1 \text{ mol L}^{-1}$  KCl solution at a fixed potential of  $-0.3 \text{ V}$ .



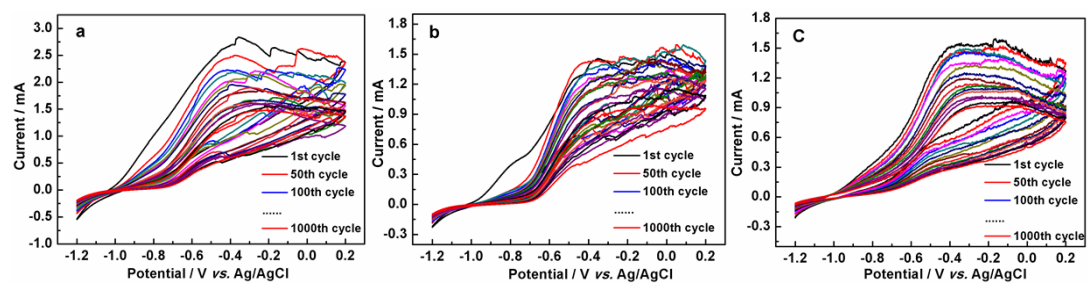

**Figure S14.** (c) CVs on PdCoP-3 (a), PdCoP GA (b) and PdCo ANN electrodes in  $\text{N}_2$ -saturated  $0.1 \text{ mol L}^{-1} \text{ N}_2\text{H}_4 + 0.1 \text{ mol L}^{-1} \text{ KOH} + 0.1 \text{ mol L}^{-1} \text{ KCl}$  solution at a scan rate of  $20 \text{ mV s}^{-1}$ .
